# Supplementary material for: The diagnostic performance of ultrafast MRI to differentiate benign from malignant breast lesions: a systematic review and meta-analysis
Source: PubMed Central journal article supplement (PMC11399157; doi:10.1007/s00330-024-10690-y), 2024-03-21

**The diagnostic performance of ultrafast MRI to differentiate benign from malignant breast lesions: A Systematic Review and Meta-Analysis**

**ELECTRONIC SUPPLEMENTARY MATERIAL**

**Table 1S Literature Search**

**Medline**

breast cancer[MeSH Terms] OR breast[Title/Abstract] OR breast neoplasm[MeSH Terms] OR breast neoplasms[MeSH Terms]

AND

(ultrafast[Title/Abstract] OR ultra-fast[Title/Abstract] OR ultra fast[Title/Abstract])

AND

MRI[Title/Abstract] OR magnetic resonance [Title/Abstract] OR magnetic resonance imaging [MeSH Terms]

**Embase**

'nuclear magnetic resonance imaging'/exp OR

'mri':ab,ti OR 'magnetic resonance':ab,ti OR 'mri scanner'/exp

AND

'ultrafast':ab,ti OR 'ultra fast':ab,ti OR

'ultra-fast':ab,ti

AND

breast:ab,ti OR 'breast disease'/exp OR 'breast tumor'/exp

**Cochrane**

- #1 MeSH descriptor: [Magnetic Resonance Imaging] explode all trees
- #2 (magnetic resonance):ti,ab,kw
- #3 MeSH descriptor: [Breast Neoplasms] explode all trees
- #4 (breast):ti,ab,kw
- #5 (ultrafast):ti,ab,kw
- #6 (ultra fast):ti,ab,kw
- #7 (ultra-fast):ti,ab,kw
- #8 (#1 OR #2) AND (#3 OR #4) AND (#5 OR #6 OR #7)

**Table 2S risk of bias summary**

| Study           | RISK OF BIAS      |            |                    |                 |
|-----------------|-------------------|------------|--------------------|-----------------|
|                 | PATIENT SELECTION | INDEX TEST | REFERENCE STANDARD | FLOW AND TIMING |
| Abe et al       |                   |            |                    |                 |
| Cao et al       |                   |            |                    |                 |
| Goto et al      |                   |            |                    |                 |
| Honda et al     |                   |            |                    |                 |
| Kim et al       |                   |            |                    |                 |
| Lee et al       |                   |            |                    |                 |
| Mann et al      |                   |            |                    |                 |
| Mori et al      |                   |            |                    |                 |
| Mus et al       |                   |            |                    |                 |
| Ohashi et al    |                   |            |                    |                 |
| Onishi et al    |                   |            |                    |                 |
| Pelissier et al |                   |            |                    |                 |
| Peter et al     |                   |            |                    |                 |
| Ramli et al     |                   |            |                    |                 |
| Van zeist et al |                   |            |                    |                 |
| Yamaguchi et al |                   |            |                    |                 |

Low Risk    
 High Risk    
 Unclear Risk

**Table 3S:** Multivariate meta-regression models evaluating the impact of different covariates on sensitivity, specificity and DOR for the main analysis

**Sensitivity**

| Covariate                                                                  | Beta coefficient (95% CI)                       | Standard error | p-value               |
|----------------------------------------------------------------------------|-------------------------------------------------|----------------|-----------------------|
| Number of lesions: >110 – reference <110                                   | 0 (-0.1;0.1)                                    | 0.051          | 0.994                 |
| Mean age                                                                   | -0.017 (-0.032;-0.001)                          | 0.008          | <b>0.034</b>          |
| Cancer prevalence: >60% - reference<60%                                    | 0.003 (-0.094;0.101)                            | 0.05           | 0.952                 |
| MRI system: Philips – reference Siemens<br>GE – reference Siemens          | 0.018 (-0.0714;0.107)<br>-0.165 (-0.287;-0.043) | 0.046<br>0.062 | 0.694<br><b>0.008</b> |
| Temporal resolution: >5sec – reference < 5sec                              | -0.053 (-0.147;0.041)                           | 0.048          | 0.27                  |
| Kinetic threshold decided: a priori – reference post hoc                   | 0.062 (-0.046;0.171)                            | 0.055          | 0.262                 |
| Reference standard: Histopathology or FU – reference only histopathology   | 0.045 (-0.059;0.15)                             | 0.053          | 0.397                 |
| Number of readers: more than 1 per lesion – reference only 1 per lesion    | -0.026 (-0.121;0.069)                           | 0.048          | 0.59                  |
| Kinetic parameter: combinations of parameters – reference single parameter | -0.012 (-0.136;0.111)                           | 0.063          | 0.846                 |
| Acceleration method: CS – reference PI<br>VS – reference PI                | -0.037 (-0.185;0.11)<br>-0.01 (-0.135;0.115)    | 0.075<br>0.063 | 0.621<br>0.876        |
| Injection speed: >2ml/sec – reference ≤2ml/sec                             | -0.02 (-0.122;0.077)                            | 0.051          | 0.658                 |

**Specificity**

| Covariate                                | Beta coefficient (95% CI) | Standard error | p-value |
|------------------------------------------|---------------------------|----------------|---------|
| Number of lesions: >110 – reference <110 | 0.114 (-0.003;0.231)      | 0.06           | 0.056   |
| Mean age                                 | 0.004 (-0.020;0.028)      | 0.012          | 0.748   |
| Cancer prevalence: >60% - reference<60%  | 0 (-0.121;0.121)          | 0.062          | 0.999   |

|                                                                               |                                                        |                |                |
|-------------------------------------------------------------------------------|--------------------------------------------------------|----------------|----------------|
| MRI system: Philips – reference Siemens<br>GE – reference Siemens             | -0.099 (-<br>0.203;0.004)<br>0.103 (-0.006;-<br>0.212) | 0.053<br>0.062 | 0.06<br>0.066  |
| Temporal resolution: >5sec – reference <<br>5sec                              | 0.112<br>(0.007;0.218)                                 | 0.054          | <b>0.037</b>   |
| Kinetic threshold decided: a priori –<br>reference post hoc                   | -0.093 (-<br>0.224;0.037)                              | 0.067          | 0.161          |
| Reference standard: Histopathology or FU –<br>reference only histopathology   | 0.065 (-<br>0.159;0.095)                               | 0.065          | 0.617          |
| Number of readers: more than 1 per lesion<br>– reference only 1 per lesion    | 0.017 (-<br>0.108;0.142)                               | 0.064          | 0.788          |
| Kinetic parameter: combinations of<br>parameters – reference single parameter | 0.069 (-<br>0.081;0.218)                               | 0.076          | 0.369          |
| Acceleration method: CS – reference PI<br>VS – reference PI                   | 0.063 (-<br>0.124;0.251)<br>0.085 (-<br>0.064;0.234)   | 0.096<br>0.076 | 0.506<br>0.265 |
| Injection speed: >2ml/sec – reference<br>≤2ml/sec                             | 0.06 (-0.063;0.184)                                    | 0.063          | 0.34           |

#### DOR

| Covariate                                                                     | Beta coefficient<br>(95% CI)                          | Standard<br>error | p-value        |
|-------------------------------------------------------------------------------|-------------------------------------------------------|-------------------|----------------|
| Number of lesions: >110 – reference <110                                      | 0.737<br>(0.111;1.364)                                | 0.320             | <b>0.021</b>   |
| Mean age                                                                      | -0.075 (-<br>0.211;0.062)                             | 0.07              | 0.284          |
| Cancer prevalence: >60% - reference<60%                                       | 0.038 (-<br>0.641;0.718)                              | 0.347             | 0.912          |
| MRI system: Philips – reference Siemens<br>GE – reference Siemens             | -0.257 (-<br>1.018;0.503)<br>-0.37 (-<br>1.252;0.511) | 0.388<br>0.449    | 0.507<br>0.409 |
| Temporal resolution: >5sec – reference <<br>5sec                              | 0.132 (-<br>0.559;0.822)                              | 0.352             | 0.709          |
| Kinetic threshold decided: a priori –<br>reference post hoc                   | -0.037 (-<br>0.832;0.758)                             | 0.406             | 0.927          |
| Reference standard: Histopathology or FU –<br>reference only histopathology   | 0.403 (-<br>0.274;1.081)                              | 0.346             | 0.243          |
| Number of readers: more than 1 per lesion –<br>reference only 1 per lesion    | 0.186 (-<br>0.493;0.864)                              | 0.346             | 0.592          |
| Kinetic parameter: combinations of<br>parameters – reference single parameter | 0.026 (-<br>0.832;0.884)                              | 0.438             | 0.952          |
| Acceleration method: CS – reference PI<br>VS – reference PI                   | 0.031 (-1.14;1.21)                                    | 0.56<br>0.492     | 0.959<br>0.583 |

|                                                   |                      |      |      |
|---------------------------------------------------|----------------------|------|------|
|                                                   | 0.27 (-0.694;1.234)  |      |      |
| Injection speed: >2ml/sec – reference<br>≤2ml/sec | 0.418 (-0.249;1.085) | 0.34 | 0.22 |

**CI:** Confidence interval **CS:** Compressed sensing. **FU:** Follow-up **GE:** General-electric **MR:** Magnetic resonance imaging. **PI:** Parallel imaging. **VS:** View sharing.

**Table 4S:** “Head to Head” Multivariate meta-regression models using MS and TTE as covariates for different effect measures, showing only the TTE vs MS coefficients

| <b>Kinetic parameter: TTE – reference MS</b> | <b>Beta coefficient (95% CI)</b> | <b>Standard error</b> | <b>p-value</b> |
|----------------------------------------------|----------------------------------|-----------------------|----------------|
| Sensitivity                                  | -0.082 (-0.253;0.089)            | 0.087                 | 0.346          |
| Specificity                                  | 0.035 (-0.111;0.181)             | 0.074                 | 0.638          |
| DOR                                          | -0.057 (-0.793;0.679)            | 0.376                 | 0.880          |

**CI:** Confidence interval **DOR:** Diagnostic odds ratio **MS:** Maximum slope **TTE:** Time to enhancement

**Figure 1S:** Funnel plot to assess publication bias for diagnostic odds ratio (DOR).

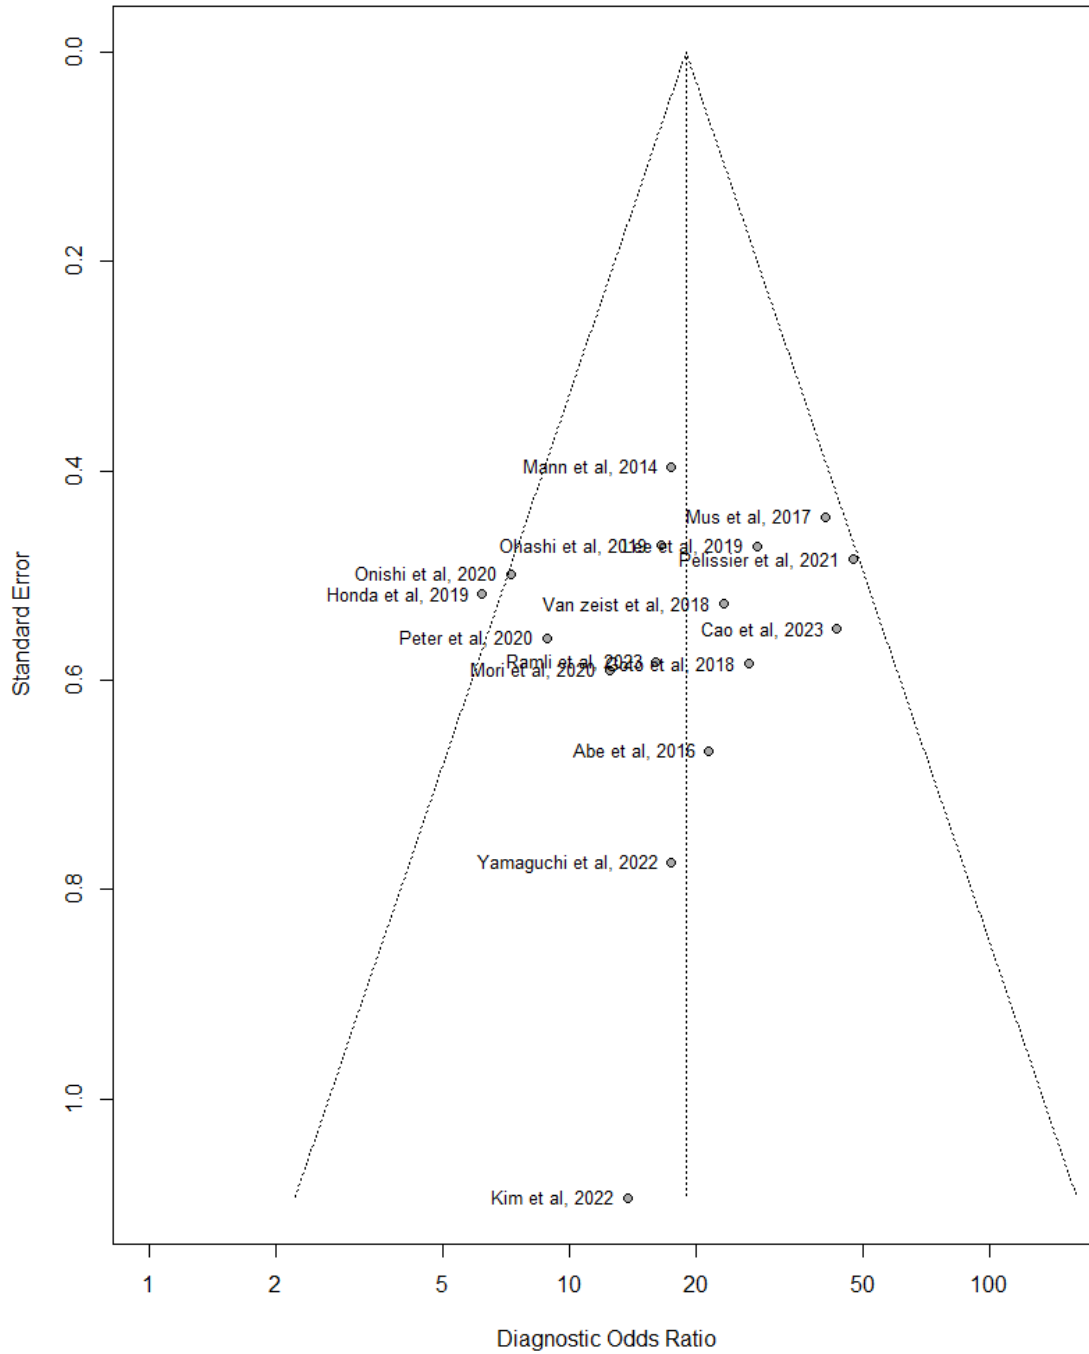

Supplement: 330_2024_10690_MOESM1_ESM.pdf [file 330_2024_10690_MOESM1_ESM.pdf]
